# Supplementary material for: Clinical Characteristics and Outcomes of Drug-Induced Acute Kidney Injury Cases
Source: PubMed Central journal article supplement — Kidney Int Rep. 2023 Aug 14;8(11):2333–44. doi: 10.1016/j.ekir.2023.07.037 (PMC10658426; doi:10.1016/j.ekir.2023.07.037), 2023-08-14
Supplement: mmc1.pdf [file mmc1.pdf]

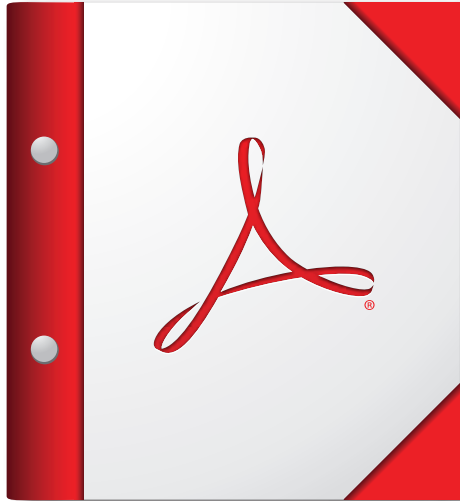

**For the best experience, open this PDF portfolio in  
Acrobat X or Adobe Reader X, or later.**

[Get Adobe Reader Now!](#)
